# Supplementary material for: Lipidomic Profiling of Rice Bran after Green Solid–Liquid Extractions for the Development of Circular Economy Approaches
Source: MDPI journal article supplement (doi:10.3390/foods12020384), 2023-01-13
Supplement: s1 [file s1]

Table S3

| Legend       |                                                     |
|--------------|-----------------------------------------------------|
| Abbreviation | Name                                                |
| ET           | Ethanol (99%) at 4 °C                               |
| ET20         | Ethanol (99%) at 20 °C                              |
| WSBU         | Water-saturated 1-butanol at 4 °C                   |
| CH-ME        | Chloroform/methanol (2:1, v/v) at 4 °C              |
| MTBE-ME      | Methyl tert-butyl ether/methanol (3:1, v/v) at 4 °C |
| DG           | Diglyceride                                         |
| TG           | Triglyceride                                        |

## The Relative Abundances of DGs and TGs in different methods

| Name                 | ET SAMPLE 1  | ET SAMPLE 2  | ET20 SAMPLE 1 | ET20 SAMPLE 2 | WSBU SAMPLE 1 | WSBU SAMPLE 2 | CH-ME SAMPLE 1 | CH-ME SAMPLE 2 | MTBE-ME SAMPLE 1 | MTBE-ME SAMPLE 2 |
|----------------------|--------------|--------------|---------------|---------------|---------------|---------------|----------------|----------------|------------------|------------------|
| DG 26:1              | 0.00         | 0.00         | 0.00          | 0.00          | 0.00          | 0.00          | 0.00           | 0.00           | 0.00             | 0.00             |
| DG 28:2              | 122837.89    | 173181.13    | 0.00          | 0.00          | 103112.77     | 72809.12      | 0.00           | 0.00           | 360843.83        | 57168.59         |
| DG 30:5              | 0.00         | 0.00         | 0.00          | 0.00          | 0.00          | 0.00          | 0.00           | 0.00           | 234441.89        | 130439.90        |
| DG 31:3              | 0.00         | 0.00         | 0.00          | 0.00          | 29686.76      | 153059.23     | 0.00           | 0.00           | 0.00             | 0.00             |
| DG 32:0              | 1516932.87   | 1318145.05   | 1196795.91    | 1360996.80    | 569098.32     | 841691.38     | 0.00           | 0.00           | 1896995.11       | 1615953.88       |
| DG 32:0 DG 16:0_16:0 | 0.00         | 0.00         | 0.00          | 0.00          | 0.00          | 0.00          | 0.00           | 0.00           | 220086.94        | 198383.59        |
| DG 32:1              | 887188.43    | 707125.05    | 649745.41     | 616417.79     | 625241.97     | 1002099.01    | 0.00           | 0.00           | 1150742.89       | 1100915.63       |
| DG 32:2              | 1473552.54   | 1276276.91   | 522126.69     | 1223704.53    | 1087936.65    | 1604642.65    | 0.00           | 0.00           | 2537418.44       | 2617317.09       |
| DG 32:2 DG 14:0_18:2 | 228637.95    | 370382.89    | 172732.87     | 341944.20     | 157976.99     | 463309.34     | 0.00           | 0.00           | 680575.00        | 696242.52        |
| DG 33:2              | 267004.00    | 171252.84    | 0.00          | 0.00          | 168282.72     | 256037.90     | 0.00           | 0.00           | 292748.94        | 355937.77        |
| DG 33:3              | 120860.22    | 172441.86    | 0.00          | 0.00          | 150671.73     | 248849.89     | 0.00           | 0.00           | 326271.50        | 311569.32        |
| DG 33:3 DG 15:1_18:2 | 0.00         | 0.00         | 0.00          | 0.00          | 0.00          | 0.00          | 0.00           | 0.00           | 236045.11        | 265762.52        |
| DG 34:0              | 278477.24    | 235618.04    | 205422.87     | 203494.81     | 3755871.94    | 5525305.97    | 0.00           | 0.00           | 274526.33        | 208266.60        |
| DG 34:1              | 36478834.16  | 31389268.45  | 31254064.09   | 32419931.93   | 12366031.75   | 17481616.10   | 0.00           | 0.00           | 43937077.33      | 42337168.16      |
| DG 34:1 DG 16:0_18:1 | 19459367.78  | 16521276.70  | 14761336.57   | 16475672.04   | 12983322.08   | 20339716.24   | 0.00           | 0.00           | 22820048.00      | 23062073.79      |
| DG 34:2              | 70657286.92  | 63961646.19  | 59472251.05   | 64794469.83   | 20037449.69   | 27323895.65   | 0.00           | 0.00           | 94488049.78      | 86321590.68      |
| DG 34:2 DG 16:0_18:2 | 68525747.89  | 57893733.61  | 52419200.00   | 60776952.93   | 51873975.49   | 75384298.78   | 0.00           | 0.00           | 90284053.33      | 86645735.15      |
| DG 34:2 DG 16:1_18:1 | 222764.49    | 166017.32    | 0.00          | 0.00          | 125176.07     | 224910.72     | 0.00           | 0.00           | 272324.33        | 224815.92        |
| DG 34:3              | 3078016.87   | 2854536.91   | 2304560.66    | 2608158.90    | 1669530.78    | 2348661.60    | 251108.11      | 439695.31      | 4628077.78       | 4308884.27       |
| DG 34:3 DG 16:0_18:3 | 2796292.32   | 2431881.65   | 1946701.66    | 2233399.78    | 2036668.90    | 2987292.82    | 0.00           | 0.00           | 4335088.44       | 4230321.55       |
| DG 34:3 DG 16:1_18:2 | 730784.59    | 559071.39    | 427039.34     | 555455.47     | 455292.54     | 764568.34     | 0.00           | 0.00           | 996012.11        | 969897.86        |
| DG 35:3              | 0.00         | 0.00         | 0.00          | 0.00          | 0.00          | 0.00          | 0.00           | 0.00           | 122106.22        | 202141.50        |
| DG 35:4 DG 17:2_18:2 | 0.00         | 0.00         | 0.00          | 0.00          | 0.00          | 0.00          | 0.00           | 0.00           | 167116.44        | 181545.29        |
| DG 36:1              | 3359564.76   | 2863583.92   | 2609345.41    | 2627581.22    | 2171421.73    | 2837608.40    | 246999.62      | 369778.20      | 3335989.11       | 2635561.75       |
| DG 36:1 DG 18:0_18:1 | 1446565.30   | 1203896.29   | 1023272.60    | 1113722.98    | 920985.72     | 1230456.13    | 0.00           | 0.00           | 1467771.56       | 1193065.83       |
| DG 36:2              | 7198059.24   | 7796072.58   | 69603168.18   | 66945294.14   | 36152536.18   | 45314232.93   | 7849624.15     | 13013170.00    | 108907960.90     | 98345301.75      |
| DG 36:2 DG 18:0_18:2 | 5761849.68   | 5586331.55   | 4048889.72    | 4170100.33    | 4381503.35    | 5859980.11    | 0.00           | 0.00           | 0.00             | 0.00             |
| DG 36:2 DG 18:1_18:1 | 94409222.92  | 82037951.34  | 79159103.65   | 79361329.50   | 70606457.34   | 97479361.77   | 5175268.68     | 7537375.00     | 123655153.80     | 118398496.30     |
| DG 36:3              | 167914980.30 | 149003533.20 | 134577135.00  | 138321057.20  | 130273723.90  | 173971291.90  | 19515761.51    | 32177335.00    | 193232085.30     | 185817003.50     |
| DG 36:3 DG 18:1_18:2 | 302303868.50 | 260635500.20 | 222890643.10  | 251289204.00  | 218848037.00  | 317952311.20  | 18907846.04    | 30924660.00    | 372998428.40     | 354978174.80     |
| DG 36:4              | 13185659.68  | 12614094.02  | 14344305.86   | 11678768.62   | 46011839.08   | 63981043.09   | 6188639.86     | 9803219.61     | 20746828.44      | 19150805.44      |
| DG 36:4 DG 18:1_18:3 | 13166784.86  | 12083772.37  | 12923367.96   | 11598123.31   | 9508909.13    | 17813199.56   | 244177.08      | 1463951.72     | 19772016.00      | 18906693.59      |
| DG 36:4 DG 18:2_18:2 | 190651336.60 | 168028028.00 | 130483935.50  | 151302053.50  | 136428866.60  | 209479156.70  | 15577596.98    | 21837167.50    | 252092416.00     | 266726797.70     |
| DG 36:5              | 8059743.14   | 6771256.91   | 6011441.33    | 6652367.74    | 3067298.12    | 4783563.26    | 843153.58      | 919959.38      | 15633633.78      | 15847029.13      |
| DG 36:5 DG 18:2_18:3 | 10685866.38  | 9019384.74   | 7662839.34    | 8575467.85    | 8004261.73    | 12562305.41   | 1334267.74     | 2143503.28     | 19781344.00      | 21256542.14      |
| DG 36:6              | 0.00         | 0.00         | 0.00          | 0.00          | 110820.40     | 175350.39     | 0.00           | 0.00           | 309194.67        | 340744.03        |
| DG 36:6 DG 18:3_18:3 | 243110.59    | 206580.00    | 165900.28     | 190240.55     | 200706.94     | 276073.15     | 0.00           | 0.00           | 445370.56        | 512824.13        |
| DG 37:7              | 1754660.32   | 1841235.05   | 1842608.40    | 3414999.12    | 3661852.95    | 2254005.53    | 3628443.02     | 3330343.13     | 2038173.78       | 1446759.03       |
| DG 38:1              | 1068718.49   | 968779.18    | 1008117.24    | 916370.55     | 797312.66     | 1119850.94    | 0.00           | 0.00           | 1237167.46       | 940653.01        |
| DG 38:1 DG 20:0_18:1 | 819199.08    | 704079.48    | 717522.60     | 654298.78     | 601485.26     | 838223.04     | 0.00           | 0.00           | 900581.44        | 663353.69        |
| DG 38:10             | 274700.65    | 246903.97    | 260445.86     | 293092.43     | 237103.47     | 320421.24     | 0.00           | 0.00           | 634966.06        | 641852.38        |
| DG 38:2              | 2642042.60   | 2288264.95   | 2117144.97    | 2304167.29    | 1474456.07    | 1993636.08    | 189769.91      | 288862.97      | 2833248.00       | 2408093.20       |
| DG 38:2 DG 18:1_20:1 | 1412246.05   | 1109013.61   | 996819.01     | 1046840.33    | 870353.64     | 1194595.36    | 0.00           | 0.00           | 1341215.67       | 1107800.29       |
| DG 38:2 DG 20:0_18:2 | 2500286.27   | 2101765.57   | 1905986.52    | 2062389.17    | 1718348.21    | 2358555.80    | 146121.51      | 254621.09      | 2590589.33       | 2331190.10       |
| DG 38:3              | 3340144.00   | 3169287.01   | 2645389.17    | 1758956.24    | 2586934.10    | 3515864.75    | 232323.77      | 403665.16      | 4588280.44       | 4028055.15       |
| DG 38:3 DG 20:1_18:2 | 3692155.68   | 3418335.26   | 2779306.52    | 1945200.44    | 2741091.79    | 3760956.91    | 241774.15      | 419796.09      | 5155189.33       | 4557447.38       |
| DG 38:4              | 193673.14    | 155899.54    | 0.00          | 0.00          | 120610.92     | 201609.94     | 0.00           | 0.00           | 234081.33        | 213935.29        |
| DG 38:4 DG 18:2_20:2 | 219973.84    | 193243.92    | 0.00          | 0.00          | 0.00          | 0.00          | 0.00           | 0.00           | 280072.56        | 295569.71        |

| Name                      | ET SAMPLE 1 | ET SAMPLE 2 | ET20 SAMPLE 1 | ET20 SAMPLE 2 | WSBU SAMPLE 1 | WSBU SAMPLE 2 | CH-ME SAMPLE 1 | CH-ME SAMPLE 2 | MTBE-ME SAMPLE 1 | MTBE-ME SAMPLE 2 |
|---------------------------|-------------|-------------|---------------|---------------|---------------|---------------|----------------|----------------|------------------|------------------|
| DG 39:7                   | 0.00        | 0.00        | 0.00          | 0.00          | 0.00          | 0.00          | 0.00           | 0.00           | 367845.56        | 408494.13        |
| DG 39:8                   | 0.00        | 0.00        | 0.00          | 0.00          | 0.00          | 0.00          | 0.00           | 0.00           | 323027.22        | 362869.42        |
| DG 40:1                   | 0.00        | 0.00        | 518161.88     | 493115.08     | 0.00          | 0.00          | 0.00           | 0.00           | 0.00             | 0.00             |
| DG 40:1 DG 22:0 18:1      | 383473.84   | 286827.37   | 300330.94     | 294485.86     | 269709.02     | 334579.67     | 0.00           | 0.00           | 319136.67        | 267860.78        |
| DG 40:2                   | 9284488.65  | 9100838.76  | 7711580.11    | 8431933.70    | 9535544.97    | 9183750.72    | 8330402.64     | 5597614.61     | 10042016.89      | 8054034.95       |
| DG 40:2 DG 22:0 18:2      | 1054434.92  | 811575.67   | 783515.41     | 836654.31     | 728500.12     | 937756.69     | 0.00           | 0.00           | 1006396.22       | 782994.47        |
| DG 40:7                   | 0.00        | 0.00        | 0.00          | 0.00          | 0.00          | 0.00          | 0.00           | 0.00           | 111709.33        | 170730.00        |
| DG 42:1 DG 24:0 18:1      | 700815.41   | 584815.15   | 511802.98     | 572451.71     | 522174.91     | 706612.43     | 0.00           | 0.00           | 570469.33        | 472430.58        |
| DG 42:2 DG 24:0 18:2      | 1582063.46  | 1244088.97  | 1296671.16    | 1220967.96    | 1138408.67    | 1553642.54    | 0.00           | 0.00           | 1480836.56       | 1062017.57       |
| DG 42:6 DG 16:0 26:6      | 0.00        | 0.00        | 0.00          | 0.00          | 0.00          | 345402.89     | 331510.28      | 0.00           | 0.00             | 0.00             |
| DG 44:2 DG 26:0 18:2      | 543050.49   | 423436.96   | 461716.63     | 325635.03     | 331485.78     | 482050.11     | 0.00           | 0.00           | 379722.89        | 348787.18        |
| DG 47:1 DG 15:0 32:1      | 0.00        | 0.00        | 0.00          | 0.00          | 0.00          | 0.00          | 106649.25      | 82950.47       | 0.00             | 0.00             |
| DG 48:1 DG 16:0 32:1      | 0.00        | 0.00        | 0.00          | 0.00          | 147561.33     | 83104.03      | 0.00           | 0.00           | 0.00             | 0.00             |
| DG 48:2 DG 16:0 32:2      | 0.00        | 0.00        | 0.00          | 0.00          | 0.00          | 0.00          | 111358.30      | 43190.16       | 0.00             | 0.00             |
| DG 52:1 DG 16:0 36:1      | 182885.03   | 169334.54   | 0.00          | 0.00          | 0.00          | 0.00          | 0.00           | 0.00           | 0.00             | 0.00             |
| DG O-37:2 DG O-21:1 16:1  | 371706.27   | 315228.71   | 324016.41     | 314061.88     | 344842.08     | 355273.92     | 909808.77      | 513841.88      | 176557.06        | 314644.17        |
| TG 24:0 TG 8:0 8:0 8:0    | 0.00        | 0.00        | 0.00          | 0.00          | 0.00          | 0.00          | 0.00           | 0.00           | 0.00             | 0.00             |
| TG 26:0 TG 8:0 8:0 10:0   | 0.00        | 0.00        | 0.00          | 0.00          | 0.00          | 0.00          | 114752.36      | 510826.72      | 0.00             | 0.00             |
| TG 34:0 TG 10:0 12:0 12:0 | 476923.30   | 483353.61   | 520450.55     | 441533.87     | 0.00          | 0.00          | 0.00           | 0.00           | 0.00             | 0.00             |
| TG 34:0 TG 8:0 12:0 14:0  | 258098.05   | 242076.91   | 0.00          | 0.00          | 378263.41     | 386870.19     | 511376.93      | 438694.84      | 679574.33        | 601357.18        |
| TG 36:0 TG 10:0 12:0 14:0 | 306525.84   | 336427.53   | 0.00          | 0.00          | 236535.49     | 340524.42     | 417140.19      | 543616.80      | 461889.06        | 172243.88        |
| TG 36:0 TG 12:0 12:0 12:0 | 408452.43   | 476688.09   | 477137.68     | 368631.88     | 484706.24     | 565596.13     | 1053517.64     | 853541.64      | 485888.72        | 495815.19        |
| TG 36:0 TG 8:0 12:0 16:0  | 0.00        | 0.00        | 0.00          | 0.00          | 0.00          | 0.00          | 0.00           | 0.00           | 0.00             | 0.00             |
| TG 38:0 TG 10:0 12:0 16:0 | 0.00        | 0.00        | 0.00          | 0.00          | 428478.12     | 374162.82     | 657412.83      | 559517.81      | 0.00             | 0.00             |
| TG 38:0 TG 12:0 12:0 14:0 | 181112.59   | 301831.96   | 383115.25     | 458523.98     | 0.00          | 0.00          | 450515.85      | 558865.00      | 350724.78        | 287593.69        |
| TG 38:0 TG 8:0 12:0 18:0  | 0.00        | 0.00        | 0.00          | 0.00          | 0.00          | 0.00          | 0.00           | 0.00           | 0.00             | 0.00             |
| TG 40:0 TG 10:0 14:0 16:0 | 627583.57   | 546724.79   | 664397.96     | 483762.21     | 670729.77     | 940716.02     | 1502131.23     | 1247911.64     | 872852.22        | 543481.26        |
| TG 40:0 TG 12:0 12:0 16:0 | 0.00        | 0.00        | 0.00          | 0.00          | 0.00          | 0.00          | 0.00           | 0.00           | 0.00             | 0.00             |
| TG 40:1 TG 8:0 14:0 18:1  | 0.00        | 0.00        | 0.00          | 0.00          | 0.00          | 0.00          | 0.00           | 0.00           | 0.00             | 0.00             |
| TG 41:0 TG 12:0 14:0 15:0 | 238842.16   | 442684.33   | 0.00          | 0.00          | 225271.50     | 506014.59     | 736994.53      | 718185.86      | 655562.50        | 345360.68        |
| TG 42:0 TG 12:0 14:0 16:0 | 2732497.08  | 2851335.26  | 3163409.72    | 3050492.43    | 2431152.60    | 2689531.49    | 5702904.15     | 4425188.44     | 2941414.22       | 2314514.37       |
| TG 42:0 TG 14:0 14:0 14:0 | 314804.16   | 309653.09   | 0.00          | 0.00          | 432620.23     | 296907.24     | 1352717.36     | 1036167.42     | 354715.11        | 218304.85        |
| TG 42:1 TG 12:0 14:0 16:1 | 576696.38   | 427138.76   | 629405.25     | 299253.59     | 528843.24     | 583204.25     | 1550293.96     | 1430875.00     | 1185009.89       | 741466.46        |
| TG 43:0 TG 12:0 15:0 16:0 | 0.00        | 0.00        | 0.00          | 0.00          | 26631.68      | 7876.63       | 0.00           | 0.00           | 0.00             | 0.00             |
| TG 43:0 TG 13:0 14:0 16:0 | 3083995.03  | 3375363.09  | 3897486.41    | 3507739.28    | 3677792.14    | 3403501.22    | 8442777.74     | 6477100.27     | 3384907.33       | 3086429.32       |
| TG 43:1 TG 13:0 14:0 16:1 | 0.00        | 0.00        | 0.00          | 0.00          | 282342.20     | 292789.28     | 896855.47      | 204602.81      | 1775819.00       | 1038766.31       |
| TG 43:1 TG 14:0 15:0 14:1 | 1792903.68  | 1617458.25  | 1830639.78    | 1672780.66    | 1811757.34    | 1706635.91    | 3890875.47     | 3031272.81     | 0.00             | 0.00             |
| TG 44:0 TG 13:0 15:0 16:0 | 5595680.87  | 6199946.80  | 5975295.03    | 5794422.54    | 7462925.67    | 6313236.24    | 19375297.55    | 13169646.88    | 6606694.67       | 5726427.18       |
| TG 44:0 TG 14:0 15:0 15:0 | 377930.86   | 402933.71   | 408907.07     | 438714.03     | 0.00          | 0.00          | 0.00           | 0.00           | 533119.28        | 426720.00        |
| TG 44:1 TG 12:0 16:0 16:1 | 4262973.41  | 4242059.38  | 0.00          | 0.00          | 4759680.46    | 4276497.68    | 9143950.94     | 6636005.00     | 4693645.33       | 4117186.80       |
| TG 44:1 TG 13:0 15:0 16:1 | 0.00        | 0.00        | 0.00          | 0.00          | 0.00          | 0.00          | 0.00           | 0.00           | 654128.33        | 544860.49        |
| TG 44:1 TG 14:0 14:0 16:1 | 610683.41   | 546104.95   | 519265.58     | 583682.65     | 0.00          | 0.00          | 2358122.45     | 1793598.91     | 0.00             | 0.00             |
| TG 44:1 TG 14:0 16:0 14:1 | 0.00        | 0.00        | 4449301.66    | 4323253.92    | 0.00          | 0.00          | 0.00           | 0.00           | 0.00             | 0.00             |
| TG 44:2 TG 10:0 16:1 18:1 | 381597.84   | 393358.87   | 424114.92     | 174577.62     | 366771.45     | 365544.97     | 0.00           | 0.00           | 0.00             | 0.00             |
| TG 44:2 TG 14:0 14:1 16:1 | 1111503.68  | 241296.29   | 499581.27     | 997550.83     | 617648.67     | 1089827.40    | 2619486.98     | 2066619.69     | 1137315.89       | 601775.19        |
| TG 45:0 TG 14:0 15:0 16:0 | 7938977.68  | 8331730.36  | 7700086.96    | 8350007.51    | 5289773.64    | 3909406.69    | 22230555.85    | 17418542.03    | 9128622.56       | 7072383.20       |
| TG 45:1 TG 13:0 16:0 16:1 | 0.00        | 0.00        | 517710.94     | 525469.01     | 0.00          | 0.00          | 0.00           | 0.00           | 0.00             | 0.00             |
| TG 45:1 TG 14:0 15:0 16:1 | 6749147.62  | 6322386.44  | 5971180.11    | 6622813.70    | 2803022.06    | 2339211.18    | 17966838.49    | 12695347.66    | 6634361.33       | 5628031.07       |
| TG 45:2 TG 14:0 15:1 16:1 | 1584647.35  | 2445008.25  | 0.00          | 0.00          | 2546536.19    | 1893520.00    | 4449829.43     | 3734080.00     | 2544142.89       | 2270560.97       |
| TG 45:2 TG 15:0 14:1 16:1 | 0.00        | 0.00        | 2051339.45    | 1819444.20    | 0.00          | 0.00          | 0.00           | 0.00           | 0.00             | 0.00             |
| TG 46:0 TG 14:0 15:0 17:0 | 223587.03   | 251824.54   | 0.00          | 0.00          | 945007.63     | 2012358.23    | 3302075.47     | 2048915.47     | 308874.56        | 285310.19        |
| TG 46:0 TG 14:0 16:0 16:0 | 10503436.11 | 9187533.20  | 8673575.53    | 10315890.28   | 13420034.22   | 6274782.43    | 27932368.30    | 20485501.25    | 10087704.00      | 9332438.84       |
| TG 46:0 TG 15:0 15:0 16:0 | 0.00        | 0.00        | 0.00          | 0.00          | 0.00          | 0.00          | 0.00           | 0.00           | 0.00             | 0.00             |
| TG 46:1 TG 14:0 16:0 16:1 | 9526800.54  | 9919075.98  | 10277050.06   | 9785152.71    | 11734818.70   | 9364200.14    | 27618669.81    | 21189051.25    | 11474760.94      | 8740409.76       |
| TG 46:2 TG 12:0 16:1 18:1 | 510093.62   | 506537.42   | 0.00          | 0.00          | 0.00          | 0.00          | 0.00           | 0.00           | 0.00             | 0.00             |
| TG 46:2 TG 14:0 16:1 16:1 | 0.00        | 0.00        | 513042.76     | 477195.80     | 0.00          | 0.00          | 2362470.76     | 1752704.84     | 460601.83        | 449032.43        |
| TG 46:2 TG 16:0 14:1 16:1 | 5695942.05  | 5463205.36  | 5507214.14    | 5188767.29    | 6715967.63    | 5930435.36    | 9962576.60     | 7478396.88     | 5953580.00       | 5119974.76       |
| TG 46:2 TG 16:0 15:1 15:1 | 0.00        | 0.00        | 0.00          | 0.00          | 563386.19     | 353275.30     | 0.00           | 0.00           | 0.00             | 0.00             |
| TG 46:3 TG 10:0 18:1 18:2 | 0.00        | 0.00        | 165605.41     | 133755.30     | 142483.58     | 178292.27     | 0.00           | 0.00           | 158660.28        | 150939.81        |
| TG 46:3 TG 14:1 16:1 16:1 | 1026986.16  | 360113.04   | 888047.24     | 748359.34     | 820868.50     | 950961.33     | 1608833.96     | 1321820.78     | 887646.61        | 352701.07        |
| TG 46:4 TG 10:0 18:2 18:2 | 0.00        | 0.00        | 142522.65     | 111996.52     | 0.00          | 0.00          | 0.00           | 0.00           | 0.00             | 0.00             |
| TG 47:0 TG 14:0 16:0 17:0 | 12274979.46 | 10998912.99 | 303121.99     | 292589.01     | 409376.47     | 225143.65     | 4410635.85     | 2425984.06     | 13625538.67      | 11684096.50      |
| TG 47:0 TG 15:0 16:0 16:0 | 303657.24   | 220336.65   | 8730306.30    | 12765009.50   | 12798761.62   | 11983570.39   | 30062541.89    | 21695710.00    | 0.00             | 0.00             |
| TG 47:1 TG 14:0 15:0 18:1 | 0.00        | 0.00        | 0.00          | 0.00          | 0.00          | 0.00          | 0.00           | 0.00           | 698680.56        | 582977.67        |
| TG 47:1 TG 15:0 16:0 16:1 | 12352425.89 | 10915375.67 | 10059114.75   | 11661359.72   | 14955505.03   | 9321977.24    | 33177564.15    | 24397492.34    | 13523736.00      | 10157728.93      |
| TG 47:2 TG 15:0 15:1 17:1 | 0.00        | 0.00        | 0.00          | 0.00          | 722767.92     | 545028.90     | 0.00           | 0.00           | 0.00             | 0.00             |
| TG 47:2 TG 15:0 16:1 16:1 | 0.00        | 0.00        | 6032620.55    | 6049056.80    | 0.00          | 0.00          | 2747338.87     | 1946293.59     | 664889.50        | 529915.19        |
| TG 47:2 TG 16:0 15:1 16:1 | 6410787.95  | 6757572.27  | 589781.49     | 593831.05     | 7104301.97    | 6153607.07    | 12566086.79    | 10250346.88    | 7115113.78       | 5761086.60       |
| TG 47:3 TG 14:1 16:1 17:1 | 752107.24   | 944139.28   | 1257153.70    | 1219496.24    | 1323230.75    | 1340274.37    | 0.00           | 0.00           | 1271303.33       | 1153236.31       |
| TG 47:3 TG 15:1 16:1 16:1 | 0.00        | 0.00        | 0.00          | 0.00          | 0.00          | 0.00          | 2839211.98     | 2213671.88     | 0.00             | 0.00             |
| TG 48:0 TG 15:0 16:0 17:0 | 26074773.62 | 19876753.92 | 15109550.50   | 18044145.80   | 18407219.42   | 14804222.76   | 38471362.64    | 25636671.56    | 17502369.33      | 14588221.65      |
| TG 48:0 TG 16:0 16:0 16:0 | 0.00        | 0.00        | 0.00          | 0.00          | 48401.39      | 28681.38      | 0.00           | 0.00           | 0.00             | 0.00             |
| TG 48:1 TG 14:0 16:0 18:1 | 16397685.62 | 16186444.54 | 14894219.67   | 17043763.98   | 8099495.18    | 11863248.51   | 5203490.09     | 3424394.38     | 20414005.33      | 16697691.65      |
| TG 48:1 TG 15:0 17:0 16:1 | 209036.54   | 243654.64   | 0.00          | 0.00          | 0.00          | 0.00          | 0.00           | 0.00           | 335821.39        | 204020.68        |
| TG 48:1 TG 16:0 16:0 16:1 | 0.00        | 0.00        | 129978.34     | 264698.45     | 0.00          | 0.00          | 40209107.92    | 30611395.00    | 0.00             | 0.00             |
| TG 48:2 TG 14:0 16:0 18:2 | 17234338.59 | 16428450.31 | 17263414.81   | 15880387.18   | 16812742.66   | 17393958.90   | 0.00           | 0.00           | 445657.17        | 446411.17        |
| TG 48:2 TG 14:0 16:1 18:1 | 513106.32   | 533932.58   | 558034.59     | 570319.34     | 481798.58     | 353112.18     | 3404027.93     | 2410163.28     | 695789.61        | 1423459.90       |
| TG 48:2 TG 16:0 16:1 16:1 | 0.00        | 0.00        | 0.00          | 0.00          | 118911.85     | 31632.54      | 3404027.93     | 2410163.28     | 17975771.44      | 13888293.88      |
| TG 48:3 TG 12:0 18:1 18:2 | 0.00        | 0.00        | 0.00          | 0.00          | 189709.71     | 270349.06     | 0.00           | 0.00           | 0.00             | 0.00             |
| TG 48:3 TG 14:1 16:1 18:1 | 5686126.97  | 5367391.96  | 5405120.44    | 4583253.48    | 4841583.82    | 5782792.04    | 6359349.43     | 4822581.88     | 4874976.89       | 4449006.60       |
| T                         |             |             |               |               |               |               |                |                |                  |                  |

| Name                      | ET SAMPLE 1  | ET SAMPLE 2  | ET20 SAMPLE 1 | ET20 SAMPLE 2 | WSBU SAMPLE 1 | WSBU SAMPLE 2 | CH-ME SAMPLE 1 | CH-ME SAMPLE 2 | MTBE-ME SAMPLE 1 | MTBE-ME SAMPLE 2 |
|---------------------------|--------------|--------------|---------------|---------------|---------------|---------------|----------------|----------------|------------------|------------------|
| TG 49:0 TG 15:0_16:0_18:0 | 8091151.57   | 6973835.05   | 7682243.54    | 8923196.46    | 8472427.51    | 8293708.95    | 20934272.45    | 17749996.41    | 8525117.33       | 7837065.39       |
| TG 49:0 TG 16:0_16:0_17:0 | 243657.51    | 268450.00    | 344563.31     | 259447.18     | 0.00          | 0.00          | 0.00           | 0.00           | 0.00             | 0.00             |
| TG 49:1 TG 15:0_16:0_18:1 | 13047474.16  | 10825797.11  | 12258301.88   | 13272690.39   | 14028113.76   | 11798255.03   | 32983165.85    | 23934617.03    | 13067202.89      | 12725055.24      |
| TG 49:1 TG 16:0_17:0_16:1 | 371445.62    | 297894.64    | 274516.91     | 384151.49     | 476507.05     | 331878.67     | 0.00           | 0.00           | 0.00             | 0.00             |
| TG 49:2 TG 15:0_16:0_18:2 | 0.00         | 0.00         | 0.00          | 0.00          | 0.00          | 0.00          | 2462371.89     | 1784479.22     | 522363.56        | 452050.73        |
| TG 49:2 TG 15:0_16:1_18:1 | 10096646.92  | 9555214.85   | 9990533.76    | 10003924.36   | 11150346.88   | 8428812.38    | 0.00           | 0.00           | 10807329.78      | 8610569.32       |
| TG 49:2 TG 16:0_16:1_17:1 | 552004.05    | 455610.98    | 0.00          | 0.00          | 0.00          | 0.00          | 22208073.96    | 17091092.50    | 0.00             | 0.00             |
| TG 49:3 TG 15:1_16:1_18:1 | 3679424.87   | 3658462.68   | 349983.87     | 380961.33     | 3813015.26    | 4099373.70    | 5992068.30     | 4067779.06     | 3634483.11       | 2883345.83       |
| TG 49:3 TG 16:0_15:1_18:2 | 364983.57    | 360510.52    | 3210726.41    | 3379366.19    | 385521.73     | 401403.43     | 0.00           | 0.00           | 377939.22        | 296489.27        |
| TG 49:3 TG 16:1_16:1_17:1 | 0.00         | 0.00         | 0.00          | 0.00          | 0.00          | 0.00          | 1069308.68     | 736460.08      | 0.00             | 0.00             |
| TG 50:0 TG 15:0_17:0_18:0 | 0.00         | 0.00         | 0.00          | 0.00          | 0.00          | 0.00          | 3876713.21     | 2963178.13     | 0.00             | 0.00             |
| TG 50:0 TG 16:0_16:0_18:0 | 8918436.97   | 8474419.79   | 8253435.36    | 7829914.81    | 8536002.20    | 8728344.39    | 16028559.15    | 10292856.56    | 8558143.78       | 7583529.90       |
| TG 50:1 TG 16:0_16:0_18:1 | 109113837.00 | 97685191.75  | 105999700.80  | 92976405.97   | 85838898.55   | 124665878.50  | 38332646.04    | 35020817.50    | 85096993.11      | 89475047.18      |
| TG 50:2 TG 16:0_16:0_18:2 | 186216757.90 | 158094892.60 | 161455446.40  | 139801762.00  | 145720911.50  | 199027666.90  | 0.00           | 0.00           | 144973264.70     | 135175851.10     |
| TG 50:2 TG 16:0_16:1_18:1 | 4393195.68   | 3723434.23   | 3912046.85    | 3714403.98    | 3990303.82    | 3973418.34    | 44410372.08    | 40492550.31    | 0.00             | 0.00             |
| TG 50:3 TG 14:0_18:1_18:2 | 35513502.16  | 33421565.05  | 34465636.80   | 30058031.16   | 878974.80     | 1187867.96    | 0.00           | 0.00           | 26287916.44      | 24718732.43      |
| TG 50:3 TG 16:0_16:1_18:2 | 0.00         | 0.00         | 0.00          | 0.00          | 14992328.01   | 19907108.70   | 0.00           | 0.00           | 1370672.56       | 736204.32        |
| TG 50:4 TG 14:0_18:2_18:2 | 18293575.57  | 16479420.21  | 18753253.48   | 14544988.51   | 12916846.24   | 19796779.34   | 917946.13      | 1307120.55     | 12460538.78      | 13467420.00      |
| TG 50:5 TG 14:0_18:2_18:3 | 3274980.54   | 2714077.01   | 3265474.20    | 2411615.91    | 2174964.16    | 3580760.72    | 0.00           | 0.00           | 2314261.11       | 2003742.43       |
| TG 50:6 TG 14:1_18:2_18:3 | 392225.68    | 328639.64    | 396768.62     | 310605.08     | 280214.45     | 405846.19     | 0.00           | 0.00           | 327766.56        | 250961.41        |
| TG 51:0 TG 16:0_17:0_18:0 | 3300728.00   | 2919164.95   | 2997644.86    | 3313537.24    | 3771135.03    | 3240302.98    | 5610157.74     | 3867119.84     | 3558473.78       | 2947202.33       |
| TG 51:0 TG 17:0_17:0_17:0 | 0.00         | 0.00         | 0.00          | 0.00          | 0.00          | 0.00          | 0.00           | 0.00           | 0.00             | 0.00             |
| TG 51:1 TG 15:0_18:0_18:1 | 233684.65    | 162104.95    | 0.00          | 0.00          | 0.00          | 0.00          | 0.00           | 0.00           | 0.00             | 0.00             |
| TG 51:1 TG 16:0_17:0_18:1 | 6847473.73   | 5728490.72   | 6609205.97    | 6458247.07    | 6436545.67    | 7116194.92    | 14562724.06    | 10598702.27    | 7059502.00       | 5894429.81       |
| TG 51:1 TG 17:0_16:0_16:1 | 0.00         | 0.00         | 0.00          | 0.00          | 286979.08     | 215056.57     | 0.00           | 0.00           | 0.00             | 0.00             |
| TG 51:2 TG 16:0_17:1_18:1 | 8790845.03   | 7568817.06   | 8364288.18    | 8047417.46    | 286654.68     | 276483.43     | 1289106.42     | 914004.14      | 7871317.33       | 8211996.07       |
| TG 51:2 TG 17:0_16:1_18:1 | 0.00         | 0.00         | 0.00          | 0.00          | 8863516.30    | 8469212.82    | 0.00           | 0.00           | 0.00             | 0.00             |
| TG 51:3 TG 15:0_18:1_18:2 | 5869750.49   | 5492206.60   | 4783889.50    | 4944220.99    | 5084006.94    | 6243000.66    | 0.00           | 0.00           | 4528889.33       | 4588041.17       |
| TG 51:3 TG 15:1_18:1_18:1 | 0.00         | 0.00         | 251165.64     | 245251.38     | 0.00          | 0.00          | 0.00           | 0.00           | 0.00             | 0.00             |
| TG 51:3 TG 16:1_17:1_18:1 | 322595.41    | 276166.80    | 0.00          | 0.00          | 1734840.69    | 1653826.41    | 0.00           | 0.00           | 227184.67        | 257792.62        |
| TG 51:4 TG 15:0_18:2_18:2 | 3457653.19   | 3459860.21   | 3681022.76    | 2844971.71    | 2615802.08    | 4336971.49    | 0.00           | 0.00           | 2745102.44       | 2475383.50       |
| TG 51:4 TG 15:1_18:1_18:2 | 430418.81    | 414745.98    | 484924.20     | 377050.72     | 887376.24     | 1087360.22    | 1411750.47     | 1118379.14     | 338788.56        | 298431.46        |
| TG 51:5 TG 15:1_18:2_18:2 | 1809634.70   | 1681279.59   | 1924136.80    | 1580305.30    | 1219566.53    | 2032287.07    | 1382407.74     | 1205699.69     | 1332010.44       | 1319145.83       |
| TG 51:6 TG 15:1_18:2_18:3 | 115983.30    | 69772.58     | 110308.73     | 74981.38      | 60306.30      | 127592.98     | 0.00           | 0.00           | 0.00             | 0.00             |
| TG 52:0 TG 12:0_12:0_28:0 | 0.00         | 0.00         | 0.00          | 0.00          | 0.00          | 0.00          | 0.00           | 0.00           | 0.00             | 0.00             |
| TG 52:0 TG 14:0_18:0_20:0 | 3286857.30   | 2995409.28   | 3303512.04    | 3035691.05    | 3506217.80    | 3457152.04    | 7309692.83     | 5071081.25     | 3399528.44       | 3149790.29       |
| TG 52:0 TG 16:0_18:0_18:0 | 806037.08    | 722391.34    | 768906.30     | 686394.20     | 623667.40     | 1130278.23    | 805354.81      | 504900.78      | 662195.61        | 675458.59        |
| TG 52:1 TG 16:0_18:0_18:1 | 31416844.11  | 27315551.55  | 27290772.60   | 21998427.51   | 23754607.63   | 40992370.06   | 16715682.08    | 11849486.88    | 21772858.22      | 25092124.47      |
| TG 52:1 TG 18:0_18:0_16:1 | 2127250.81   | 1433693.51   | 0.00          | 0.00          | 1367595.38    | 2217628.07    | 0.00           | 0.00           | 0.00             | 0.00             |
| TG 52:2 TG 16:0_18:1_18:1 | 392203059.00 | 348911751.80 | 370594179.90  | 322205391.40  | 296939089.90  | 465409332.20  | 53485782.26    | 59250508.44    | 285449928.90     | 318098771.30     |
| TG 52:2 TG 18:0_16:1_18:1 | 2574307.89   | 3029228.66   | 2924920.44    | 2623664.53    | 2602049.25    | 3707219.45    | 0.00           | 0.00           | 2551723.33       | 1988606.41       |
| TG 52:3 TG 16:0_18:1_18:2 | 631149734.90 | 547935239.60 | 559266647.50  | 487732400.40  | 485161411.30  | 694523527.10  |                |                | 488978040.00     | 471197352.20     |
| TG 52:3 TG 16:1_18:1_18:1 | 0.00         | 0.00         | 0.00          | 0.00          | 845327.51     | 1820403.09    | 54787631.32    | 68019373.44    | 0.00             | 0.00             |
| TG 52:3 TG 17:1_17:1_18:1 | 1645642.38   | 1538915.46   | 0.00          | 0.00          | 0.00          | 0.00          | 0.00           | 0.00           | 0.00             | 0.00             |
| TG 52:4 TG 16:0_18:1_18:3 | 15329458.16  | 14928831.34  | 14270637.79   | 14020709.83   | 14021009.02   | 16508301.44   | 0.00           | 0.00           | 14804856.89      | 11575019.03      |
| TG 52:4 TG 16:0_18:2_18:2 | 470076609.70 | 436545187.60 | 450901653.90  | 378965993.40  | 364772949.80  | 520491788.70  | 31959365.28    | 44713409.69    | 361092323.60     | 329551161.20     |
| TG 52:5 TG 16:0_18:2_18:3 | 63194986.38  | 66270617.73  | 76122513.59   | 56858247.96   | 50946965.55   | 82979462.10   | 3475560.76     | 4827188.83     | 49483210.22      | 50087716.89      |
| TG 52:6 TG 16:0_18:3_18:3 | 3143204.97   | 2782974.59   | 2809100.11    | 1992176.58    | 2186415.03    | 3260615.47    | 0.00           | 0.00           | 1799135.56       | 1616505.53       |
| TG 52:6 TG 16:1_18:2_18:3 | 0.00         | 0.00         | 632399.56     | 461660.99     | 0.00          | 0.00          | 0.00           | 0.00           | 0.00             | 0.00             |
| TG 53:0 TG 14:0_15:0_24:0 | 2462479.14   | 2876142.89   | 2607100.77    | 2414731.05    | 2519238.61    | 3224355.14    | 5429653.96     | 3814991.88     | 0.00             | 0.00             |
| TG 53:0 TG 17:0_17:0_19:0 | 0.00         | 0.00         | 0.00          | 0.00          | 0.00          | 0.00          | 1904409.81     | 1025333.13     | 0.00             | 0.00             |
| TG 53:0 TG 14:0_16:0_23:0 | 0.00         | 0.00         | 0.00          | 0.00          | 0.00          | 0.00          | 0.00           | 0.00           | 2819919.56       | 2953059.22       |
| TG 53:1 TG 17:0_18:0_18:1 | 2810884.97   | 2690709.90   | 0.00          | 0.00          | 2991888.79    | 3004857.90    | 6750393.21     | 4155863.13     | 3046230.22       | 2619062.91       |
| TG 53:1 TG 17:0_20:0_16:1 | 0.00         | 0.00         | 2905964.20    | 2776596.24    | 0.00          | 0.00          | 0.00           | 0.00           | 0.00             | 0.00             |
| TG 53:2 TG 17:0_18:1_18:1 | 4853187.46   | 3869657.32   | 4498773.04    | 4071291.49    | 3944736.65    | 5058997.57    | 3090153.02     | 2527169.38     | 3814962.67       | 3882298.64       |
| TG 53:2 TG 18:0_17:1_18:1 | 4040598.05   | 3718634.64   | 4095071.82    | 3833121.33    | 0.00          | 0.00          | 6197583.02     | 4056625.00     | 0.00             | 0.00             |
| TG 53:3 TG 17:0_18:1_18:2 | 5199651.46   | 4350412.78   | 4998643.54    | 4315512.49    | 4328311.68    | 6019799.34    | 4198486.42     | 3190658.13     | 4199853.78       | 3963404.27       |
| TG 53:4 TG 17:1_18:1_18:2 | 3575751.35   | 3526931.55   | 3553996.91    | 3130023.65    | 1600528.30    | 2304449.12    | 1625992.83     | 1367553.44     | 2688926.44       | 2555038.64       |
| TG 53:5 TG 17:1_18:2_18:2 | 164388.54    | 167332.94    | 1535923.65    | 1318462.21    | 1262570.06    | 1613098.79    | 332789.81      | 255302.42      | 0.00             | 0.00             |
| TG 53:5 TG 18:1_17:2_18:2 | 1360585.73   | 1275894.95   | 175013.54     | 110028.23     | 124086.65     | 203516.85     | 0.00           | 0.00           | 824111.89        | 1022932.43       |
| TG 53:6 TG 17:2_18:2_18:2 | 0.00         | 0.00         | 0.00          | 0.00          | 169113.24     | 275524.20     | 0.00           | 0.00           | 0.00             | 0.00             |
| TG 54:0 TG 14:0_16:0_24:0 | 2976292.97   | 2644034.85   | 2756183.20    | 2846105.41    | 0.00          | 0.00          | 8893715.09     | 6404299.06     | 3173205.56       | 3061359.03       |
| TG 54:0 TG 15:0_16:0_23:0 | 0.00         | 0.00         | 0.00          | 0.00          | 3020728.56    | 2876436.02    | 0.00           | 0.00           | 0.00             | 0.00             |
| TG 54:0 TG 18:0_18:0_18:0 | 0.00         | 0.00         | 199108.62     | 209862.71     | 0.00          | 0.00          | 0.00           | 0.00           | 0.00             | 0.00             |
| TG 54:1 TG 16:0_20:0_18:1 | 13383727.89  | 12750724.69  | 12266364.14   | 9690378.45    | 10338193.12   | 18044672.49   | 0.00           | 0.00           | 10356037.17      | 11561134.13      |
| TG 54:1 TG 18:0_18:0_18:1 | 0.00         | 0.00         | 0.00          | 0.00          | 0.00          | 0.00          | 11461938.49    | 7974027.81     | 0.00             | 0.00             |
| TG 54:2 TG 16:0_18:1_20:1 | 3498756.11   | 3192587.63   | 3136169.28    | 2706072.71    | 2845762.31    | 4089567.29    | 1175515.66     | 960227.81      | 2472640.22       | 2862720.78       |
| TG 54:2 TG 18:0_18:1_18:1 | 68574872.22  | 61189087.01  | 60214870.28   | 43117362.21   | 46236922.08   | 95660828.29   | 13193299.62    | 10366606.88    | 41515246.22      | 52136164.66      |
| TG 54:3 TG 18:1_18:1_18:1 | 456285016.20 | 408384216.90 | 421305981.90  | 377108760.20  | 184100293.60  | 289923110.60  | 54769281.89    | 61645404.38    | 331426108.40     | 382305804.30     |
| TG 54:4 TG 18:1_18:1_18:2 | 637825174.50 | 566972240.80 | 558045626.50  | 489705659.20  | 495912565.10  | 732843486.40  | 48794972.45    | 64257770.94    | 490857579.60     | 493933070.30     |
| TG 54:5 TG 18:1_18:2_18:2 | 748374114.60 | 708851640.40 | 691646186.10  | 604602197.60  | 596595527.40  | 850028400.40  | 47940110.57    | 68075898.13    | 568577838.20     | 526368118.10     |
| TG 54:6 TG 18:1_18:2_18:3 | 413461661.40 | 409990560.00 | 454422978.10  | 352289128.00  | 324460659.40  | 500274362.00  | 19189868.68    | 26214227.50    | 294914730.70     | 294256714.60     |
| TG 54:6 TG 16:0_18:2_18:2 | 1287001.95   | 270230.82    | 0.00          | 0.00          | 0.00          | 0.00          | 3933956.23     | 5277636.25     | 21940387.56      | 20174940.58      |
| TG 54:7 TG 18:2_18:2_18:3 | 52742734.70  | 49458743.92  | 55128088.40   | 39892017.24   | 36247961.16   | 56917349.83   | 1833657.45     | 3169557.89     | 34206233.33      | 33391630.68      |
| TG 54:8 TG 18:2_18:3_18:3 |              |              |               |               |               |               |                |                |                  |                  |

| Name                      | ET SAMPLE 1 | ET SAMPLE 2 | ET20 SAMPLE 1 | ET20 SAMPLE 2 | WSBU SAMPLE 1 | WSBU SAMPLE 2 | CH-ME SAMPLE 1 | CH-ME SAMPLE 2 | MTBE-ME SAMPLE 1 | MTBE-ME SAMPLE 2 |
|---------------------------|-------------|-------------|---------------|---------------|---------------|---------------|----------------|----------------|------------------|------------------|
| TG 55:0 TG 15:0 16:0 24:0 | 3235312.43  | 2927721.65  | 3461941.27    | 3451249.61    | 3686346.01    | 3532558.23    | 8212551.13     | 5691164.53     | 3594344.00       | 3265711.46       |
| TG 55:1 TG 15:0 24:0 16:1 | 2700939.03  | 2427777.11  | 2733556.24    | 2656408.18    | 2604900.81    | 2962990.94    | 5427485.66     | 4002557.81     | 2672888.44       | 2558289.32       |
| TG 55:2 TG 19:0 18:1 18:1 | 0.00        | 0.00        | 8430544.97    | 8436851.27    | 0.00          | 0.00          | 3534957.74     | 3372023.75     | 7462042.67       | 6945140.97       |
| TG 55:2 TG 21:0 16:1 18:1 | 2246687.35  | 2081707.42  | 2170372.82    | 1964220.33    | 2075901.50    | 2386135.69    | 3559097.74     | 2419164.53     | 2063547.11       | 1925673.59       |
| TG 55:2 TG 24:0 15:1 16:1 | 0.00        | 0.00        | 0.00          | 0.00          | 0.00          | 0.00          | 0.00           | 0.00           | 0.00             | 0.00             |
| TG 55:3 TG 17:1 18:1 20:1 | 0.00        | 0.00        | 0.00          | 0.00          | 0.00          | 0.00          | 1687498.49     | 1050485.86     | 0.00             | 0.00             |
| TG 55:3 TG 18:1 18:1 19:1 | 1792516.65  | 1807094.02  | 1834908.62    | 1666536.91    | 1580701.50    | 2380127.51    | 0.00           | 0.00           | 1352833.33       | 1602066.21       |
| TG 55:3 TG 19:0 18:1 18:2 | 0.00        | 0.00        | 0.00          | 0.00          | 9839641.16    | 10350108.29   | 0.00           | 0.00           | 0.00             | 0.00             |
| TG 55:4 TG 18:1 19:1 18:2 | 0.00        | 0.00        | 0.00          | 0.00          | 892966.01     | 1427960.00    | 0.00           | 0.00           | 887013.67        | 1002642.33       |
| TG 55:5 TG 19:1 18:2 18:2 | 1141767.35  | 642376.96   | 0.00          | 0.00          | 0.00          | 0.00          | 0.00           | 0.00           | 0.00             | 0.00             |
| TG 56:0 TG 15:0 16:0 25:0 | 3705939.89  | 3581210.72  | 3735714.92    | 3560459.67    | 3939336.42    | 3096385.41    | 7903836.98     | 5373000.63     | 3960744.00       | 3910168.93       |
| TG 56:0 TG 16:0 16:0 24:0 | 0.00        | 0.00        | 243320.44     | 248237.13     | 293321.73     | 202590.11     | 591403.49      | 396939.92      | 0.00             | 0.00             |
| TG 56:1 TG 15:0 25:0 16:1 | 0.00        | 0.00        | 4739923.98    | 3823998.67    | 0.00          | 0.00          | 0.00           | 0.00           | 0.00             | 0.00             |
| TG 56:1 TG 16:0 22:0 18:1 | 358065.68   | 364745.46   | 30011.27      | 269118.18     | 4482043.93    | 7032407.07    | 0.00           | 0.00           | 368852.11        | 361736.41        |
| TG 56:1 TG 16:0 24:0 16:1 | 5278450.60  | 4633947.22  | 0.00          | 0.00          | 327690.92     | 446526.91     | 8420520.38     | 6057517.34     | 4828251.11       | 5381638.84       |
| TG 56:2 TG 20:0 18:1 18:1 | 22039550.92 | 20875471.03 | 19670867.18   | 13635395.86   | 14321261.62   | 33007987.18   | 0.00           | 0.00           | 12511416.89      | 17539330.49      |
| TG 56:2 TG 22:0 16:1 18:1 | 0.00        | 0.00        | 0.00          | 0.00          | 0.00          | 0.00          | 4562418.49     | 3854465.94     | 927796.94        | 1219211.36       |
| TG 56:3 TG 18:1 18:1 20:1 | 40871586.59 | 35735808.66 | 36606579.23   | 26171932.71   | 1590505.78    | 2675432.93    | 0.00           | 0.00           | 0.00             | 0.00             |
| TG 56:3 TG 20:0 18:1 18:2 | 2141737.73  | 1959142.27  | 0.00          | 0.00          | 26476526.24   | 60474625.41   | 2794301.70     | 2773096.56     | 24306865.89      | 33626917.28      |
| TG 56:4 TG 18:1 20:1 18:2 | 40291467.57 | 35035468.76 | 36397627.18   | 30176456.02   | 29363650.64   | 52732677.24   | 2273933.77     | 2799461.56     | 26657334.33      | 33702658.54      |
| TG 56:5 TG 20:0 18:2 18:3 | 351002.27   | 318585.88   | 0.00          | 0.00          | 251056.07     | 417237.24     | 0.00           | 0.00           | 0.00             | 0.00             |
| TG 56:5 TG 20:1 18:2 18:2 | 18018098.16 | 15731541.44 | 15118585.64   | 12668794.70   | 13608745.43   | 20951536.80   | 1890519.81     | 1996226.41     | 13642870.56      | 13396351.55      |
| TG 56:6 TG 18:2 18:2 20:2 | 3203597.19  | 2808135.46  | 2690813.70    | 2325556.24    | 2320697.11    | 3342767.07    | 0.00           | 0.00           | 0.00             | 0.00             |
| TG 56:6 TG 20:1 18:2 18:3 | 0.00        | 0.00        | 0.00          | 0.00          | 0.00          | 0.00          | 0.00           | 0.00           | 2194385.11       | 2038006.99       |
| TG 56:6 TG 9:0 9:0 38:6   | 0.00        | 0.00        | 0.00          | 0.00          | 0.00          | 0.00          | 571136.70      | 503311.64      | 0.00             | 0.00             |
| TG 57:0 TG 16:0 17:0 24:0 | 2874642.16  | 2738221.86  | 2768709.61    | 2811828.07    | 3030375.49    | 2850248.62    | 6643725.28     | 4537318.44     | 3079156.00       | 2713941.36       |
| TG 57:1 TG 16:0 25:0 16:1 | 2402521.51  | 2254152.99  | 2439447.51    | 2485190.72    | 2713301.27    | 2681663.20    | 5654957.36     | 3858187.50     | 2864146.89       | 2557870.10       |
| TG 57:2 TG 23:0 16:1 18:1 | 1857271.35  | 1734256.70  | 1832587.18    | 1637502.54    | 1696056.53    | 2211974.37    | 2923174.72     | 2147054.38     | 1758395.11       | 2002402.91       |
| TG 57:3 TG 16:1 17:1 24:1 | 0.00        | 0.00        | 0.00          | 0.00          | 775934.97     | 1359065.64    | 1157656.70     | 835013.91      | 0.00             | 0.00             |
| TG 57:3 TG 21:0 18:1 18:2 | 9209529.95  | 7946020.62  | 9280146.74    | 9059209.72    | 8747815.95    | 10062204.64   | 0.00           | 0.00           | 7873438.22       | 8226688.16       |
| TG 57:4 TG 21:0 18:2 18:2 | 0.00        | 0.00        | 0.00          | 0.00          | 570154.05     | 856724.53     | 0.00           | 0.00           | 0.00             | 0.00             |
| TG 58:0 TG 16:0 17:0 25:0 | 2393130.81  | 2353071.13  | 1669812.04    | 2341389.83    | 2521490.87    | 1632672.04    | 4584531.32     | 2854714.53     | 1835911.22       | 1457484.95       |
| TG 58:1 TG 16:0 24:0 18:1 | 4180337.95  | 4331198.35  | 4072760.33    | 3732323.43    | 3940678.90    | 6704145.30    | 5796086.42     | 3822127.50     | 3850901.00       | 5245823.59       |
| TG 58:2 TG 16:0 24:0 18:2 | 0.00        | 0.00        | 607533.98     | 462102.43     | 7459216.88    | 16678200.77   | 0.00           | 0.00           | 0.00             | 0.00             |
| TG 58:2 TG 22:0 18:1 18:1 | 9586376.65  | 8849378.97  | 8093858.12    | 5534068.51    | 0.00          | 0.00          | 0.00           | 0.00           | 6853497.33       | 10532887.77      |
| TG 58:2 TG 24:0 16:1 18:1 | 630391.62   | 592607.53   | 0.00          | 0.00          | 0.00          | 0.00          | 4168349.43     | 2840671.56     | 501420.83        | 690424.32        |
| TG 58:3 TG 22:0 18:1 18:2 | 8357611.19  | 7810808.56  | 7414419.83    | 4973994.20    | 5223054.10    | 12494839.83   | 1378239.06     | 1125268.98     | 4910528.83       | 7241963.79       |
| TG 58:4 TG 18:1 22:1 18:2 | 6901745.73  | 6050320.41  | 5604312.49    | 4101620.77    | 4556131.79    | 9722822.54    | 610267.92      | 618610.16      | 3936040.44       | 5690217.48       |
| TG 58:4 TG 22:0 18:2 18:2 | 201506.16   | 221886.29   | 291009.17     | 249801.11     | 243375.38     | 434611.82     | 610267.92      | 618610.16      | 277414.61        | 351602.86        |
| TG 58:5 TG 18:0 18:0 22:5 | 0.00        | 0.00        | 0.00          | 0.00          | 0.00          | 0.00          | 0.00           | 0.00           | 0.00             | 0.00             |
| TG 58:5 TG 22:1 18:2 18:2 | 1414554.81  | 1226747.63  | 1368796.24    | 1223480.77    | 866304.10     | 1951535.47    | 0.00           | 0.00           | 787735.83        | 1306043.30       |
| TG 59:0 TG 16:0 17:0 26:0 | 957233.84   | 976096.91   | 0.00          | 0.00          | 1043181.97    | 1525858.34    | 3392020.76     | 1391382.81     | 1100020.11       | 955515.83        |
| TG 59:0 TG 16:0 18:0 25:0 | 0.00        | 0.00        | 954914.59     | 869342.32     | 0.00          | 0.00          | 0.00           | 0.00           | 0.00             | 0.00             |
| TG 59:1 TG 16:0 25:0 18:1 | 1560431.24  | 1526526.80  | 1528405.30    | 1388860.55    | 1450329.13    | 1586658.79    | 3384251.32     | 2123088.91     | 1496795.89       | 1406489.32       |
| TG 59:2 TG 25:0 16:1 18:1 | 1470290.70  | 1337637.01  | 1467575.58    | 1294104.75    | 1401359.88    | 1862537.46    | 2439991.13     | 1511515.00     | 1376007.44       | 1545027.48       |
| TG 59:3 TG 23:0 18:1 18:2 | 783982.97   | 710229.02   | 723381.44     | 553548.67     | 549786.71     | 1183691.38    | 0.00           | 0.00           | 682276.06        | 856145.83        |
| TG 59:3 TG 25:0 16:1 18:2 | 0.00        | 0.00        | 0.00          | 0.00          | 0.00          | 0.00          | 673948.87      | 504537.34      | 0.00             | 0.00             |
| TG 59:4 TG 23:0 18:2 18:2 | 405079.68   | 417782.16   | 425056.13     | 307144.14     | 293283.01     | 610535.03     | 0.00           | 0.00           | 273975.61        | 395376.31        |
| TG 60:0 TG 16:0 18:0 26:0 | 951306.92   | 522207.53   | 988109.39     | 508854.70     | 523875.72     | 538803.59     | 1444178.21     | 1122082.66     | 1056497.33       | 516022.18        |
| TG 60:0 TG 17:0 18:0 25:0 | 0.00        | 0.00        | 0.00          | 0.00          | 0.00          | 0.00          | 987230.09      | 403768.59      | 0.00             | 0.00             |
| TG 60:1 TG 16:0 26:0 18:1 | 1286176.65  | 1203832.99  | 1158447.74    | 1036466.85    | 1285218.84    | 1896571.49    | 2134283.02     | 1289416.33     | 1281413.78       | 1534911.85       |
| TG 60:2 TG 24:0 18:1 18:1 | 5433491.03  | 5553806.13  | 5349400.99    | 3788932.38    | 4381732.37    | 10991061.55   | 2125278.30     | 1488096.72     | 3960253.06       | 7340978.45       |
| TG 60:3 TG 24:0 18:1 18:2 | 7440376.87  | 6788767.27  | 6118322.43    | 3914176.80    | 4979977.05    | 12663211.49   | 1040054.43     | 802540.47      | 4645554.56       | 8238374.95       |
| TG 60:4 TG 24:0 18:2 18:2 | 6538025.62  | 6017059.38  | 5856287.40    | 3777305.53    | 4132442.54    | 10764873.65   | 300757.36      | 388741.02      | 3826357.78       | 6412097.09       |
| TG 60:5 TG 24:0 18:2 18:3 | 902396.54   | 864399.85   | 823715.75     | 547055.08     | 659320.58     | 1228096.69    | 0.00           | 0.00           | 565402.11        | 878357.18        |
| TG 61:0 TG 16:0 17:0 28:0 | 0.00        | 0.00        | 0.00          | 0.00          | 0.00          | 0.00          | 853796.60      | 615954.30      | 0.00             | 0.00             |
| TG 61:0 TG 16:0 20:0 25:0 | 329900.92   | 334737.53   | 383351.60     | 315915.64     | 357323.35     | 395238.56     | 0.00           | 0.00           | 373307.72        | 323023.06        |
| TG 61:1 TG 16:0 27:0 18:1 | 544145.73   | 501279.48   | 483010.11     | 471513.15     | 541827.63     | 547550.00     | 1264592.36     | 758837.89      | 539815.11        | 471778.01        |
| TG 61:2 TG 25:0 18:1 18:1 | 705743.51   | 758292.53   | 0.00          | 0.00          | 624026.47     | 857076.63     | 0.00           | 0.00           | 629291.72        | 777250.92        |
| TG 61:2 TG 27:0 16:1 18:1 | 0.00        | 0.00        | 706413.65     | 573504.81     | 0.00          | 0.00          | 1153547.17     | 754475.31      | 0.00             | 0.00             |
| TG 61:3 TG 25:0 18:1 18:2 | 498138.27   | 488398.51   | 452809.72     | 373640.00     | 457825.03     | 800646.24     | 0.00           | 0.00           | 437440.22        | 578237.33        |
| TG 61:4 TG 25:0 18:2 18:2 | 319316.86   | 281498.66   | 282504.53     | 146642.10     | 214268.84     | 541638.34     | 0.00           | 0.00           | 222738.89        | 363359.81        |
| TG 62:0 TG 16:0 22:0 24:0 | 301521.68   | 280125.93   | 217465.19     | 228121.22     | 261060.00     | 212368.90     | 563941.51      | 467372.11      | 280615.00        | 240943.20        |
| TG 62:1 TG 16:0 28:0 18:1 | 465004.86   | 462434.02   | 409985.30     | 405316.35     | 396146.47     | 565034.14     | 1359839.62     | 584308.91      | 450030.89        | 505923.16        |
| TG 62:2 TG 16:0 16:1 30:1 | 0.00        | 0.00        | 0.00          | 0.00          | 0.00          | 0.00          | 0.00           | 0.00           | 0.00             | 0.00             |
| TG 62:2 TG 26:0 18:1 18:1 | 1152569.62  | 1210666.60  | 1150729.28    | 920593.87     | 1128601.85    | 2337245.97    | 0.00           | 0.00           | 1137282.17       | 1829764.47       |
| TG 62:3 TG 26:0 18:1 18:2 | 1370298.81  | 1394980.93  | 1393673.92    | 925419.61     | 1215390.93    | 2947537.85    | 528233.40      | 394073.52      | 1124847.11       | 2209797.67       |
| TG 62:4 TG 26:0 18:2 18:2 | 1240655.14  | 1072106.50  | 990850.39     | 584385.08     | 886854.74     | 2290878.90    | 0.00           | 0.00           | 868611.83        | 1544206.89       |
| TG 62:5 TG 26:0 18:2 18:3 | 0.00        | 0.00        | 0.00          | 0.00          | 181930.46     | 339586.63     | 0.00           | 0.00           | 196479.50        | 215037.86        |
| TG 63:0 TG 16:0 23:0 24:0 | 0.00        | 0.00        | 0.00          | 0.00          | 0.00          | 0.00          | 372697.36      | 275774.92      | 0.00             | 0.00             |
| TG 63:1 TG 15:0 16:0 32:1 | 205427.73   | 238678.09   | 190758.29     | 207401.82     | 230179.31     | 252122.54     | 506807.83      | 473713.75      | 243859.67        | 193413.45        |
| TG 63:2 TG 15:0 16:1 32:1 | 0.00        | 0.00        | 0.00          | 0.00          | 286183.47     | 336145.69     | 0.00           | 0.00           | 273669.22        | 274130.58        |
| TG 63:2 TG 15:0 18:1 30:1 | 262921.95   | 242117.53   | 0.00          | 0.00          | 0.00          | 0.00          | 655530.75      | 459969.45      | 0.00             | 0.00             |
| TG 63:3 TG 27:0 18:1 18:2 | 194464.86   | 180156.70   | 0.00          | 0.00          | 0.00          | 0.00          | 0.00           | 0.00           | 0.00             | 0.00             |
| TG 64:1 TG 16:0 24:0 24:1 | 187988.38   | 257472.78   | 0.00          | 0.00          | 0.00          | 0.00          | 0.00           | 0.00           | 0.00             | 0.00             |
| TG 64:1 TG 16:0 30:0 18:1 | 0.00        | 0.00        | 0.00          | 0.00          | 155393.24     | 200984.75     | 627623.02      | 303790.08      | 266579.89        | 238204.66        |
| TG 64:2 TG 16:0 16:1 32:1 | 317135.95   | 306355.77   | 315526.74     | 222452.27     | 0.00          | 0.00          | 491006.98      | 410151.0       |                  |                  |
