# Supplementary material for: Lipidomic Profiling of Rice Bran after Green Solid–Liquid Extractions for the Development of Circular Economy Approaches
Source: MDPI journal article supplement (doi:10.3390/foods12020384), 2023-01-13
Supplement: s1 [file s1]

Table S1

| Legend       |                                                     |
|--------------|-----------------------------------------------------|
| Abbreviation | Name                                                |
| ET           | Ethanol (99%) at 4 °C                               |
| ET20         | Ethanol (99%) at 20 °C                              |
| WSBU         | Water-saturated 1-butanol at 4 °C                   |
| CH-ME        | Chloroform/methanol (2:1, v/v) at 4 °C              |
| MTBE-ME      | Methyl tert-butyl ether/methanol (3:1, v/v) at 4 °C |
| LPC          | Lysophosphatidylcholine                             |
| LPE          | Lysophosphatidylethanolamine                        |
| PC           | Phosphatidylcholine                                 |
| PE           | Phosphatidylethanolamine                            |
| PG           | Phosphoglycerol                                     |
| PI           | Phosphatidylinositols                               |
| LPLs         | Lysophospholipids                                   |
| PLs          | Phospholipids                                       |

### The Relative Abundances of PLs and LPLs in different methods

| Name                 | ET SAMPLE 1 | ET SAMPLE 2 | ET20 SAMPLE 1 | ET20 SAMPLE 2 | WSBU SAMPLE 1 | WSBU SAMPLE 2 | CH-ME SAMPLE 1 | CH-ME SAMPLE 2 | MTBE-ME SAMPLE 1 | MTBE-ME SAMPLE 2 |
|----------------------|-------------|-------------|---------------|---------------|---------------|---------------|----------------|----------------|------------------|------------------|
| LPC 16:0             | 207448.27   | 204945.52   | 0.00          | 0.00          | 290257.28     | 317502.27     | 0.00           | 0.00           | 0.00             | 0.00             |
| LPC 16:0/0:0         | 610171.41   | 564635.93   | 662080.88     | 624667.73     | 1648420.23    | 1540908.29    | 456587.36      | 705844.53      | 1024748.33       | 1503866.70       |
| LPC 18:1             | 159436.22   | 150015.57   | 8302255.53    | 7520207.74    | 9508539.19    | 9115664.12    | 3744393.59     | 7016758.59     | 222199.83        | 325926.84        |
| LPC 18:1/0:0         | 4159406.27  | 3484195.05  | 3284619.01    | 3230213.70    | 5045655.95    | 7381328.62    | 2433985.66     | 2675835.94     | 5102592.89       | 7066326.99       |
| LPC 18:2             | 233053.68   | 231220.21   | 240682.76     | 218543.98     | 6593081.97    | 6932425.80    | 2941491.13     | 4485630.63     | 4701720.89       | 7024048.74       |
| LPC 18:2/0:0         | 2609000.22  | 2395782.89  | 2489403.09    | 2199537.68    | 3765810.87    | 5173208.84    | 1381480.85     | 2094960.94     | 3138423.78       | 4335105.24       |
| LPC 18:3             | 155817.62   | 149544.90   | 0.00          | 0.00          | 170373.87     | 180895.64     | 0.00           | 0.00           | 97761.06         | 149245.58        |
| LPE 16:0             | 0.00        | 0.00        | 0.00          | 0.00          | 0.00          | 0.00          | 0.00           | 0.00           | 107185.83        | 160302.18        |
| LPE 18:1             | 400596.22   | 360900.10   | 348765.75     | 358015.58     | 324396.24     | 353623.51     | 0.00           | 0.00           | 459937.33        | 757298.74        |
| LPE 18:2             | 725748.49   | 696271.03   | 662499.45     | 666748.23     | 563299.36     | 624601.30     | 229156.60      | 325011.09      | 849264.39        | 1203696.02       |
| LPE O-3:0            | 18536375.35 | 18015665.15 | 18857104.97   | 17950118.90   | 4411133.87    | 4204102.10    | 0.00           | 0.00           | 0.00             | 0.00             |
| PC 32:0              | 319468.49   | 313456.80   | 111711.27     | 309228.95     | 0.00          | 0.00          | 230309.62      | 347010.78      | 613093.06        | 1002635.34       |
| PC 32:0 PC 16:0_16:0 | 0.00        | 0.00        | 0.00          | 0.00          | 346042.31     | 222142.60     | 0.00           | 0.00           | 0.00             | 0.00             |
| PC 32:1              | 473897.62   | 222372.99   | 397638.12     | 462347.79     | 482903.99     | 530347.51     | 503508.40      | 439250.78      | 804585.94        | 1369851.94       |
| PC 32:2              | 159856.59   | 291861.13   | 348358.73     | 289137.57     | 323913.87     | 337099.45     | 257968.49      | 436223.75      | 762006.89        | 906660.49        |
| PC 34:1              | 505832.86   | 505371.13   | 12334275.30   | 11661935.64   | 284878.61     | 592106.30     | 389053.68      | 620453.13      | 2047088.00       | 1141140.39       |
| PC 34:1 PC 16:0_18:1 | 11404672.86 | 11188638.35 | 0.00          | 0.00          | 7695310.98    | 12593889.94   | 9608360.00     | 14501408.75    | 20035011.56      | 35597284.66      |
| PC 34:2              | 414905.08   | 385886.60   | 10374440.06   | 9033438.79    | 423031.79     | 464287.62     | 7996020.76     | 12133611.56    | 1527399.00       | 682354.47        |
| PC 34:2 PC 16:0_18:2 | 9182547.89  | 8635185.16  | 0.00          | 0.00          | 8939665.20    | 9708064.53    | 0.00           | 0.00           | 24825409.78      | 26492551.46      |
| PC 34:3              | 254302.65   | 228260.93   | 285322.71     | 243616.24     | 232586.59     | 236378.18     | 222682.55      | 352814.38      | 770296.67        | 330822.04        |
| PC 36:1              | 488558.97   | 460385.52   | 522938.45     | 475525.47     | 514104.39     | 551470.72     | 373692.08      | 465530.70      | 1745051.44       | 1572850.10       |
| PC 36:2              | 524793.68   | 532705.77   | 538503.15     | 519631.05     | 612292.49     | 582283.04     | 388855.09      | 573907.34      | 2221025.56       | 2426666.60       |
| PC 36:2 PC 18:1_18:1 | 10880218.81 | 10336839.59 | 10812670.94   | 10421810.39   | 10799417.34   | 12418347.85   | 7736520.76     | 11998945.00    | 34125223.11      | 36624105.63      |
| PC 36:3              | 15724753.89 | 16008057.58 | 900458.12     | 760205.30     | 853395.14     | 880288.56     | 562969.43      | 1049637.03     | 3532820.22       | 4058672.23       |
| PC 36:3 PC 18:1_18:2 | 0.00        | 0.00        | 16355546.52   | 10325893.48   | 16878692.25   | 15978430.94   | 12966710.94    | 18955680.00    | 47026453.33      | 48982219.81      |
| PC 36:4              | 342572.86   | 315874.07   | 397457.90     | 183898.62     | 312547.34     | 324222.43     | 286469.43      | 462599.38      | 1029642.78       | 1117684.27       |
| PC 36:4 PC 18:2_18:2 | 5208272.43  | 6831839.18  | 8332803.54    | 6687465.19    | 6709515.38    | 7284950.28    | 6150366.42     | 10026608.13    | 18745905.78      | 20012542.14      |
| PC 36:5              | 178490.59   | 380981.29   | 427300.88     | 413889.61     | 184289.60     | 278774.09     | 363584.43      | 637058.59      | 918790.06        | 987623.50        |
| PC 38:1              | 0.00        | 0.00        | 116222.93     | 96486.52      | 0.00          | 0.00          | 0.00           | 0.00           | 478961.72        | 559761.80        |
| PC 37:2              | 0.00        | 0.00        | 0.00          | 0.00          | 0.00          | 0.00          | 520593.77      | 455217.58      | 0.00             | 0.00             |
| PC 38:2              | 0.00        | 0.00        | 0.00          | 0.00          | 0.00          | 0.00          | 0.00           | 0.00           | 387295.67        | 411858.40        |
| PC 38:3              | 0.00        | 0.00        | 0.00          | 0.00          | 0.00          | 0.00          | 0.00           | 0.00           | 353114.61        | 387486.17        |

| Name                 | ET SAMPLE 1 | ET SAMPLE 2 | ET20 SAMPLE 1 | ET20 SAMPLE 2 | WSBU SAMPLE 1 | WSBU SAMPLE 2 | CH-ME SAMPLE 1 | CH-ME SAMPLE 2 | MTBE-ME SAMPLE 1 | MTBE-ME SAMPLE 2 |
|----------------------|-------------|-------------|---------------|---------------|---------------|---------------|----------------|----------------|------------------|------------------|
| PC 42:1              | 0.00        | 0.00        | 0.00          | 0.00          | 109783.99     | 130818.12     | 0.00           | 0.00           | 368727.33        | 328417.09        |
| PC 42:2              | 0.00        | 0.00        | 0.00          | 0.00          | 0.00          | 0.00          | 0.00           | 0.00           | 404800.33        | 377251.84        |
| PC 44:1              | 0.00        | 0.00        | 0.00          | 0.00          | 0.00          | 0.00          | 0.00           | 0.00           | 113446.72        | 106682.82        |
| PC O-44:1            | 0.00        | 0.00        | 641068.34     | 441426.52     | 0.00          | 0.00          | 0.00           | 0.00           | 498972.44        | 459204.51        |
| PE 32:2              | 0.00        | 0.00        | 0.00          | 0.00          | 0.00          | 0.00          | 0.00           | 0.00           | 180222.11        | 168199.32        |
| PE 34:1              | 0.00        | 0.00        | 0.00          | 0.00          | 0.00          | 0.00          | 0.00           | 0.00           | 563873.06        | 500262.67        |
| PE 34:1 PE 16:0_18:1 | 961678.49   | 989963.40   | 873905.69     | 910576.13     | 1116837.69    | 1128531.27    | 504187.36      | 732992.73      | 4407671.11       | 4551329.32       |
| PE 34:2              | 221822.16   | 216743.71   | 208390.33     | 218357.35     | 242832.72     | 222911.99     | 0.00           | 0.00           | 820845.28        | 787360.92        |
| PE 34:2 PE 16:0_18:2 | 2394530.38  | 2213462.47  | 2160895.03    | 2335810.83    | 2319018.27    | 2730138.34    | 839362.36      | 1307932.50     | 10182342.22      | 10989607.77      |
| PE 36:2              | 0.00        | 0.00        | 0.00          | 0.00          | 0.00          | 0.00          | 0.00           | 0.00           | 339048.94        | 345257.62        |
| PE 36:2 PE 18:1_18:1 | 526313.51   | 546219.38   | 566403.09     | 546065.30     | 599184.05     | 564350.11     | 273715.47      | 436695.31      | 2796517.33       | 2557509.71       |
| PE 36:3              | 0.00        | 0.00        | 0.00          | 0.00          | 0.00          | 0.00          | 0.00           | 0.00           | 625674.61        | 636249.66        |
| PE 36:3 PE 18:1_18:2 | 1430587.46  | 1254389.07  | 1362612.04    | 808644.92     | 1381317.46    | 1493152.16    | 805151.70      | 1288752.03     | 6111664.89       | 6291059.81       |
| PE 36:4              | 0.00        | 0.00        | 0.00          | 0.00          | 0.00          | 0.00          | 0.00           | 0.00           | 451928.44        | 430131.70        |
| PE 36:4 PE 18:2_18:2 | 1007730.49  | 993015.36   | 1054101.66    | 1003462.98    | 508733.12     | 872387.79     | 819653.87      | 1211477.58     | 3478487.78       | 3757489.32       |
| PE 42:2              | 0.00        | 0.00        | 0.00          | 0.00          | 0.00          | 0.00          | 0.00           | 0.00           | 189924.39        | 170371.17        |
| PG 34:2              | 0.00        | 0.00        | 0.00          | 0.00          | 0.00          | 0.00          | 0.00           | 0.00           | 131138.67        | 162486.89        |
| PI 34:1              | 201579.95   | 237109.07   | 198681.22     | 211341.44     | 408821.39     | 348078.23     | 0.00           | 0.00           | 475648.06        | 508688.88        |
| PI 34:2              | 496292.27   | 509000.88   | 476138.29     | 485215.30     | 944343.82     | 836299.72     | 0.00           | 0.00           | 1002189.11       | 1010641.46       |
| PI 36:2              | 0.00        | 0.00        | 0.00          | 0.00          | 0.00          | 0.00          | 0.00           | 0.00           | 140364.33        | 152909.42        |
| PI 36:3              | 84948.43    | 148547.47   | 149025.86     | 66215.69      | 276005.78     | 256213.70     | 0.00           | 0.00           | 303461.44        | 354595.83        |
| PI 36:4              | 0.00        | 0.00        | 0.00          | 0.00          | 150812.08     | 151449.94     | 0.00           | 0.00           | 165614.06        | 185022.72        |
