# Supplementary material for: Lipidomic Profiling of Rice Bran after Green Solid–Liquid Extractions for the Development of Circular Economy Approaches
Source: MDPI journal article supplement (doi:10.3390/foods12020384), 2023-01-13
Supplement: s1 [file s1]

# Table S4

| Legend       |                                                     |
|--------------|-----------------------------------------------------|
| Abbreviation | Name                                                |
| ET           | Ethanol (99%) at 4 °C                               |
| ET20         | Ethanol (99%) at 20 °C                              |
| WSBU         | Water-saturated 1-butanol at 4 °C                   |
| CH-ME        | Chloroform/methanol (2:1, v/v) at 4 °C              |
| MTBE-ME      | Methyl tert-butyl ether/methanol (3:1, v/v) at 4 °C |
| NAE          | N-acylethanolamine                                  |
| ST           | Sterol                                              |

## The Relative Abundances of NAEs and STs in different methods

| Name                  | ET SAMPLE 1 | ET SAMPLE 2 | ET20 SAMPLE 1 | ET20 SAMPLE 2 | WSBU SAMPLE 1 | WSBU SAMPLE 2 | CH-ME SAMPLE 1 | CH-ME SAMPLE 2 | MTBE-ME SAMPLE 1 | MTBE-ME SAMPLE 2 |
|-----------------------|-------------|-------------|---------------|---------------|---------------|---------------|----------------|----------------|------------------|------------------|
| NAE 13:1              | 1108858.92  | 356714.95   | 0.00          | 0.00          | 49446.47      | 141367.02     | 0.00           | 0.00           | 208064.11        | 139309.17        |
| NAE 14:0              | 487744.00   | 592019.48   | 0.00          | 0.00          | 0.00          | 0.00          | 1368059.87     | 249962.42      | 751890.28        | 124829.90        |
| NAE 14:1              | 270512.00   | 1116668.97  | 304893.26     | 138352.27     | 138186.88     | 370235.58     | 258864.34      | 777113.87      | 475779.72        | 281078.84        |
| NAE 16:0              | 0.00        | 0.00        | 0.00          | 0.00          | 0.00          | 0.00          | 0.00           | 0.00           | 285278.67        | 15953.93         |
| NAE 20:1              | 1306079.35  | 940290.93   | 308399.34     | 154653.98     | 94039.02      | 312815.25     | 196029.76      | 747958.75      | 303189.56        | 205009.17        |
| NAE 21:1              | 0.00        | 0.00        | 0.00          | 0.00          | 0.00          | 0.00          | 0.00           | 0.00           | 103621.11        | 98272.09         |
| NAE 22:4              | 143689.46   | 517697.89   | 0.00          | 0.00          | 87028.38      | 161328.07     | 699069.34      | 544157.73      | 96125.28         | 93358.35         |
| ST 29:1;O;Hex;FA 16:0 | 403533.19   | 295901.49   | 312283.76     | 419116.13     | 334756.30     | 432501.88     | 0.00           | 0.00           | 620679.89        | 493095.92        |
| ST 29:1;O;Hex;FA 18:1 | 428959.57   | 313672.37   | 276877.90     | 380920.55     | 291646.88     | 387789.28     | 0.00           | 0.00           | 576841.83        | 429323.59        |
| ST 29:1;O;Hex;FA 18:2 | 268029.30   | 210397.11   | 188105.69     | 181503.98     | 180389.83     | 232602.43     | 0.00           | 0.00           | 353958.00        | 328551.70        |
