# Supplementary material for: Lipidomic Profiling of Rice Bran after Green Solid–Liquid Extractions for the Development of Circular Economy Approaches
Source: MDPI journal article supplement (doi:10.3390/foods12020384), 2023-01-13
Supplement: s1 [file s1]

# Table S2

| Legend       |                                                     |
|--------------|-----------------------------------------------------|
| Abbreviation | Name                                                |
| ET           | Ethanol (99%) at 4 °C                               |
| ET20         | Ethanol (99%) at 20 °C                              |
| WSBU         | Water-saturated 1-butanol at 4 °C                   |
| CH-ME        | Chloroform/methanol (2:1, v/v) at 4 °C              |
| MTBE-ME      | Methyl tert-butyl ether/methanol (3:1, v/v) at 4 °C |
| Cer          | Ceramide                                            |
| HexCer       | Hexosylceramide                                     |

## The Relative Abundances of Cers and HexCers in different methods

| Name                                       | ET SAMPLE 1 | ET SAMPLE 2 | ET20 SAMPLE 1 | ET20 SAMPLE 2 | WSBU SAMPLE 1 | WSBU SAMPLE 2 | CH-ME SAMPLE 1 | CH-ME SAMPLE 2 | MTBE-ME SAMPLE 1 | MTBE-ME SAMPLE 2 |
|--------------------------------------------|-------------|-------------|---------------|---------------|---------------|---------------|----------------|----------------|------------------|------------------|
| Cer 40:0;40   Cer 18:0;30/22:0;(2OH)       | 0.00        | 0.00        | 0.00          | 0.00          | 135587.57     | 176370.66     | 0.00           | 0.00           | 380502.22        | 392615.00        |
| Cer 40:1;40   Cer 18:1;30/22:0;(2OH)       | 0.00        | 0.00        | 0.00          | 0.00          | 0.00          | 0.00          | 0.00           | 0.00           | 208519.78        | 226813.50        |
| Cer 41:0;40   Cer 18:0;30/23:0;(2OH)       | 0.00        | 0.00        | 0.00          | 0.00          | 0.00          | 0.00          | 0.00           | 0.00           | 375094.89        | 331253.98        |
| Cer 41:1;40   Cer 18:1;30/23:0;(2OH)       | 0.00        | 0.00        | 0.00          | 0.00          | 0.00          | 0.00          | 0.00           | 0.00           | 178585.06        | 203617.48        |
| Cer 42:0;40   Cer 18:0;30/24:0;(2OH)       | 575356.32   | 554892.63   | 599982.82     | 660923.43     | 809050.75     | 1220857.46    | 645441.42      | 550680.00      | 2648474.22       | 2666060.97       |
| Cer 42:1;40   Cer 18:1;30/24:0;(2OH)       | 0.00        | 0.00        | 0.00          | 0.00          | 279010.17     | 394061.33     | 0.00           | 0.00           | 899282.94        | 829390.49        |
| Cer 43:0;40   Cer 18:0;30/25:0;(2OH)       | 229182.70   | 196583.40   | 249273.48     | 229201.55     | 286765.90     | 427198.45     | 0.00           | 0.00           | 929968.83        | 853800.97        |
| Cer 44:0;20   Cer 20:0;20/24:0             | 354303.30   | 190182.06   | 0.00          | 0.00          | 384517.98     | 353538.12     | 0.00           | 0.00           | 0.00             | 0.00             |
| Cer 44:0;40   Cer 18:0;30/26:0;(2OH)       | 426883.62   | 407077.53   | 390037.68     | 401188.84     | 529438.38     | 626748.40     | 375674.06      | 334805.94      | 1194302.89       | 1106950.10       |
| Cer 44:1;40   Cer 18:1;30/26:0;(2OH)       | 0.00        | 0.00        | 0.00          | 0.00          | 0.00          | 0.00          | 0.00           | 0.00           | 225303.33        | 213770.44        |
| Cer 46:0;20   Cer 20:0;20/26:0             | 0.00        | 0.00        | 0.00          | 0.00          | 345884.05     | 361464.59     | 0.00           | 0.00           | 0.00             | 0.00             |
| Cer 46:0;20   Cer 22:0;20/24:0             | 436454.27   | 353059.59   | 343270.55     | 322152.38     | 0.00          | 0.00          | 870186.23      | 563987.73      | 365964.06        | 289323.20        |
| Cer 47:1;40   Cer 22:0;30/25:1;(2OH)       | 157170.92   | 170879.18   | 0.00          | 0.00          | 0.00          | 0.00          | 0.00           | 0.00           | 0.00             | 0.00             |
| Cer 48:0;20   Cer 24:0;20/24:0             | 0.00        | 0.00        | 0.00          | 0.00          | 0.00          | 0.00          | 0.00           | 0.00           | 0.00             | 0.00             |
| Cer 48:0;20   Cer 22:0;20/26:0             | 0.00        | 0.00        | 0.00          | 0.00          | 0.00          | 0.00          | 772712.08      | 356242.50      | 0.00             | 0.00             |
| HexCer 38:2;30   HexCer 18:2;20/20:0;O     | 0.00        | 0.00        | 0.00          | 0.00          | 0.00          | 0.00          | 0.00           | 0.00           | 420342.33        | 466767.18        |
| HexCer 40:1;40   HexCer 18:1;30/22:0;(2OH) | 0.00        | 0.00        | 0.00          | 0.00          | 0.00          | 0.00          | 0.00           | 0.00           | 467706.83        | 405640.97        |
| HexCer 42:1;40   HexCer 18:1;30/24:0;(2OH) | 0.00        | 0.00        | 0.00          | 0.00          | 170182.89     | 160150.39     | 0.00           | 0.00           | 786978.17        | 735813.16        |
| HexCer 42:2;30   HexCer 18:2;20/24:0;O     | 0.00        | 0.00        | 0.00          | 0.00          | 0.00          | 0.00          | 0.00           | 0.00           | 162154.00        | 150371.50        |
| HexCer 44:1;40   HexCer 18:1;30/26:0;(2OH) | 0.00        | 0.00        | 0.00          | 0.00          | 0.00          | 0.00          | 0.00           | 0.00           | 146585.56        | 140688.35        |
