# Supplementary figures and images for: Lipidomic Profiling of Rice Bran after Green Solid–Liquid Extractions for the Development of Circular Economy Approaches
Source: MDPI journal article supplement (doi:10.3390/foods12020384), 2023-01-13

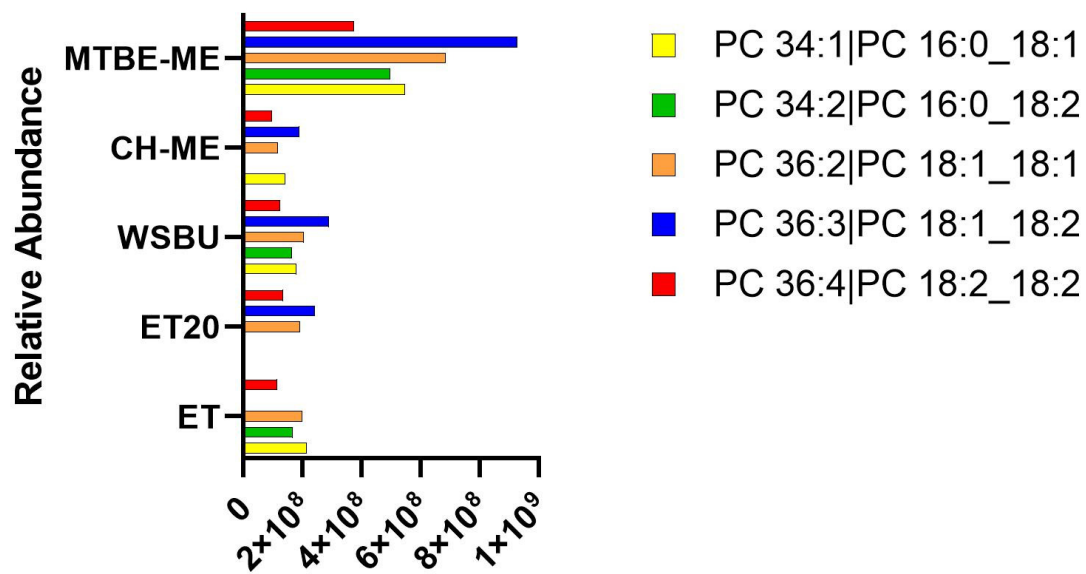

**Figure S1.** Relative abundance of main PCs acyl chains in different extraction methods.

Supplement: s1 [file s1]
